# Supplementary material for: Maturation of the Visceral (Gut-Adipose-Liver) Network in Response to the Weaning Reaction versus Adult Age and Impact of Maternal High-Fat Diet
Source: MDPI journal article supplement (doi:10.3390/nu13103438), 2021-09-28
Supplement: s1 [file s1]

# SUPPLEMENTAL MATERIALS

**Table S1. Regression coefficients for associations given in Figure 3AB**

| Age related associations in pooled groups          | Gut-CT caecum | Gut-CT colon | L-CT caecum | L-CT colon | VF-CT caecum | VF-CT colon | Gut-GE10 caecum | Gut-GE10 colon | Gut-GE60 caecum | Gut-GE60 colon | Gut-GU10 caecum | Gut-GU10 colon | Gut-GU60 caecum | Gut-GU60 colon | Steatosi Macro caecum | Steatosi Macro colon | Liver lobular inflamm. caecum | Liver lobular inflamm. colon | Portal inflamm. caecum | Portal inflamm. colon | Score tot colon (ns caecum) | L-GE10 caecum | L-GE10 colon | L-GU10 caecum (ns colon) | VF-GE10 caecum (ns colon) | VF-GE60 caecum (ns colon) | VF-GU10 caecum (ns colon) | VF-GU60 caecum | VF-GU60 colon |
|----------------------------------------------------|---------------|--------------|-------------|------------|--------------|-------------|-----------------|----------------|-----------------|----------------|-----------------|----------------|-----------------|----------------|-----------------------|----------------------|-------------------------------|------------------------------|------------------------|-----------------------|-----------------------------|---------------|--------------|--------------------------|---------------------------|---------------------------|---------------------------|----------------|---------------|
| <i>g_Adlercreutzia</i>                             | 0,5           |              | 0,6         | 0,5        |              |             | -0,4            | -0,4           | -0,5            |                | -0,4            | -0,4           | -0,4            |                |                       |                      |                               |                              |                        |                       | -0,5                        |               |              | -0,4                     |                           |                           |                           |                |               |
| <i>g_Akkermansia</i>                               |               |              |             |            |              | 0,5         | -0,4            |                |                 |                | -0,3            |                |                 |                |                       |                      |                               |                              |                        |                       | -0,5                        | -0,4          |              |                          | -0,6                      |                           | -0,5                      |                |               |
| <i>g_Bacillus</i>                                  | 0,4           | 0,4          |             | 0,4        |              |             |                 |                |                 | -0,4           |                 |                | -0,4            |                |                       |                      |                               |                              | -0,5                   |                       | -0,5                        |               |              |                          |                           |                           |                           |                |               |
| <i>g_Bifidobacterium</i>                           |               |              | 0,5         | 0,4        |              |             |                 |                |                 |                |                 |                |                 |                |                       |                      |                               |                              |                        |                       |                             |               |              |                          |                           |                           |                           |                |               |
| <i>g_Bilophila</i>                                 |               | 0,4          |             | 0,5        |              |             |                 |                |                 |                |                 |                |                 |                |                       |                      |                               |                              |                        |                       |                             |               |              |                          |                           |                           |                           |                |               |
| <i>g_Blautia</i>                                   |               |              |             |            |              |             |                 |                |                 |                |                 |                |                 |                |                       | 0,6                  |                               |                              | -0,5                   |                       |                             |               |              |                          |                           |                           |                           |                |               |
| <i>g_Burkholderiaceae_uncl</i>                     | 0,4           |              | 0,4         | 0,4        |              |             |                 |                |                 |                |                 |                |                 |                |                       |                      |                               |                              |                        |                       |                             |               |              |                          |                           |                           |                           |                |               |
| <i>g_Clostridiales_uncl</i>                        | -0,5          |              |             | -0,4       |              |             |                 |                |                 |                |                 |                |                 |                |                       |                      |                               |                              |                        |                       |                             | 0,3           |              |                          |                           |                           |                           |                |               |
| <i>g_Coprobaillus</i>                              |               |              |             |            |              |             | -0,3            |                |                 |                |                 |                |                 |                |                       |                      |                               | 0,6                          |                        |                       |                             |               |              |                          |                           |                           |                           |                |               |
| <i>g_Coproccoccus</i>                              | -0,5          |              |             |            |              | 0,4         |                 |                |                 |                |                 |                |                 |                |                       |                      | 0,5                           |                              |                        |                       |                             | 0,4           |              |                          |                           |                           |                           |                |               |
| <i>g_Corynebacterium</i>                           |               |              | -0,4        |            |              |             |                 |                |                 |                |                 |                |                 |                |                       |                      |                               |                              |                        | 0,5                   |                             |               |              |                          |                           |                           |                           |                |               |
| <i>g_Dehalobacterium</i>                           | -0,5          |              |             | -0,4       |              |             |                 |                |                 |                |                 |                |                 |                |                       |                      |                               |                              |                        |                       |                             | 0,4           |              |                          |                           |                           |                           |                |               |
| <i>g_Desulfovibrio</i>                             | 0,4           |              | 0,5         |            |              |             | -0,4            |                |                 |                |                 |                |                 |                |                       |                      |                               |                              |                        |                       |                             | -0,5          | -0,4         |                          | -0,4                      |                           |                           |                |               |
| <i>g_Lactobacillus</i>                             | 0,7           | 0,4          | 0,5         |            |              |             |                 |                |                 |                |                 |                |                 |                |                       |                      |                               |                              |                        |                       |                             | -0,4          |              |                          |                           |                           |                           |                |               |
| <i>g_Planococaceae_uncl</i>                        | 0,4           |              |             |            |              |             |                 |                |                 |                |                 |                |                 |                |                       |                      |                               |                              |                        |                       |                             |               |              |                          |                           |                           |                           |                |               |
| <i>g_Oscillospira</i>                              | -0,5          |              |             |            |              | 0,5         | 0,4             | 0,4            |                 |                |                 |                |                 |                |                       |                      |                               |                              |                        |                       |                             | 0,4           |              |                          | 0,4                       | 0,3                       |                           |                |               |
| <i>g_rc44</i>                                      | -0,6          | -0,4         | -0,5        | -0,4       | -0,4         | -0,4        | 0,4             | 0,3            | 0,4             |                |                 |                |                 |                |                       |                      |                               |                              |                        |                       |                             | 0,5           | 0,5          |                          | 0,3                       |                           |                           |                |               |
| <i>g_RF39_uncl</i>                                 | 0,4           | 0,4          | 0,4         | 0,4        |              |             | -0,4            | -0,3           | -0,5            |                |                 |                |                 |                |                       | 0,6                  |                               |                              |                        |                       |                             |               |              |                          | -0,4                      | -0,4                      |                           |                |               |
| <i>g_Rikenellaceae_uncl</i>                        |               |              | 0,4         |            |              |             |                 |                |                 |                |                 |                |                 |                |                       |                      |                               |                              |                        |                       |                             | -0,4          |              |                          |                           |                           |                           |                |               |
| <i>g_Roseburia</i>                                 | -0,4          | -0,5         | -0,6        | -0,6       | -0,4         | -0,5        |                 |                |                 |                |                 |                |                 |                |                       |                      |                               |                              |                        |                       |                             |               |              |                          |                           |                           |                           |                |               |
| <i>g_Ruminococcaceae_uncl</i>                      | -0,6          | -0,4         | -0,4        | -0,4       | -0,4         | -0,4        | 0,4             |                |                 | 0,3            |                 |                |                 |                |                       |                      |                               |                              |                        |                       |                             | 0,4           | 0,4          |                          |                           |                           |                           |                |               |
| <i>g_S247_uncl</i>                                 | -0,7          | -0,4         | -0,5        |            | -0,4         | 0,4         | 0,4             |                |                 |                |                 |                |                 |                |                       |                      |                               |                              |                        |                       |                             | 0,4           | 0,3          |                          |                           |                           |                           |                |               |
| <i>g_Streptococcus</i>                             |               |              | 0,3         |            |              |             |                 |                |                 |                |                 |                |                 |                |                       |                      |                               |                              |                        |                       |                             |               |              |                          |                           |                           |                           |                | -0,4          |
| Adipocytokine.signaling.pathway                    | -0,7          |              |             |            |              | 0,3         | 0,4             |                |                 |                |                 |                |                 |                |                       |                      |                               |                              |                        |                       |                             | 0,4           |              |                          |                           |                           |                           |                |               |
| Arginine.and.proline.metabolism                    | -0,7          | -0,4         |             |            |              |             | 0,4             |                |                 |                |                 |                |                 |                |                       |                      |                               |                              |                        |                       |                             | 0,4           |              |                          |                           |                           |                           |                |               |
| D.Alanine.metabolism                               | 0,6           | 0,5          |             | 0,4        |              |             | -0,3            |                |                 | -0,3           |                 |                |                 |                |                       |                      |                               |                              |                        |                       |                             |               |              |                          |                           |                           |                           |                |               |
| Energy.metabolism                                  | -0,7          |              |             |            |              |             | 0,3             | 0,3            |                 |                |                 |                |                 |                |                       |                      |                               |                              |                        |                       |                             |               |              |                          | 0,4                       | 0,4                       |                           |                |               |
| Glycine.serine.and.threonine.metabolism            | -0,8          | -0,4         | -0,4        |            |              |             | 0,4             |                |                 | 0,4            |                 |                |                 |                |                       |                      |                               |                              |                        |                       |                             | 0,4           |              |                          |                           |                           |                           |                |               |
| Glycolysis..Gluconeogenesis                        | 0,7           |              |             |            |              |             |                 |                |                 |                |                 |                |                 |                |                       |                      |                               |                              |                        |                       |                             | -0,3          |              |                          | -0,4                      | -0,3                      |                           |                |               |
| Glycosaminoglycan.degradation                      | -0,7          | -0,4         |             |            |              |             |                 |                |                 | 0,3            |                 |                |                 |                |                       |                      |                               |                              |                        |                       |                             | 0,4           | 0,4          |                          |                           |                           |                           |                |               |
| Glycosphingolipid.biosynthesis..ganglio.series     | -0,7          | -0,4         |             |            |              | 0,4         | 0,4             | 0,3            |                 |                |                 |                |                 |                |                       |                      |                               |                              |                        |                       |                             | 0,5           | 0,4          |                          |                           |                           |                           |                |               |
| Glycosphingolipid.biosynthesis..globo.series       | -0,7          | -0,4         | -0,4        | -0,3       | -0,4         | 0,4         | 0,4             | 0,4            |                 |                |                 |                |                 |                |                       |                      |                               |                              |                        |                       |                             | 0,5           | 0,4          |                          |                           |                           |                           |                |               |
| Lipoic.acid.metabolism                             | -0,6          |              |             |            |              |             |                 |                |                 | 0,3            |                 |                |                 |                |                       |                      |                               |                              |                        |                       |                             | 0,3           | 0,3          |                          |                           |                           |                           |                |               |
| Lipopolysaccharide.biosynthesis                    | -0,6          |              |             |            |              |             |                 |                |                 |                |                 |                |                 |                |                       |                      |                               |                              |                        |                       |                             |               |              |                          |                           |                           |                           |                |               |
| Lipopolysaccharide.biosynthesis.proteins           | -0,6          |              |             |            |              |             |                 |                |                 |                |                 |                |                 |                |                       |                      |                               |                              |                        |                       |                             |               |              | 0,3                      |                           |                           |                           |                |               |
| Lysine.biosynthesis                                | -0,5          |              |             |            |              |             |                 |                |                 |                |                 |                |                 |                |                       |                      |                               |                              |                        |                       |                             |               |              |                          | 0,4                       | 0,3                       | 0,4                       |                |               |
| MAPK.signaling.pathway..yeast                      | -0,8          |              |             |            |              | 0,4         | 0,4             | 0,4            |                 |                |                 |                |                 |                |                       |                      |                               |                              |                        |                       |                             | 0,4           |              |                          |                           |                           |                           |                |               |
| N.Glycan.biosynthesis                              | -0,7          |              |             |            |              | 0,4         | 0,4             | 0,4            | 0,5             |                |                 |                |                 |                |                       |                      |                               |                              |                        |                       |                             | 0,4           | 0,5          |                          |                           |                           |                           |                |               |
| Nitrogen.metabolism (also 6 mo)                    |               |              |             |            |              |             |                 |                |                 |                |                 |                |                 |                |                       |                      |                               | -0,6                         |                        |                       |                             |               |              |                          |                           |                           |                           |                |               |
| Other.glycan.degradation                           | -0,7          | -0,4         | -0,4        |            | 0,4          | 0,3         | 0,3             |                |                 |                |                 |                |                 |                |                       |                      |                               |                              |                        |                       |                             | 0,4           | 0,3          |                          |                           |                           |                           |                |               |
| Oxidative.phosphorylation                          | -0,6          |              |             |            |              |             |                 |                | 0,4             |                | -0,6            |                |                 |                |                       |                      |                               |                              |                        |                       |                             |               |              |                          | 0,4                       | 0,3                       | 0,4                       | 0,5            |               |
| Pentose.phosphate.pathway                          | 0,5           |              |             |            |              |             |                 |                |                 |                |                 |                |                 |                |                       |                      |                               |                              |                        |                       |                             |               |              |                          |                           |                           |                           |                |               |
| Peptidoglycan.biosynthesis                         | 0,6           | 0,4          |             |            |              |             |                 |                |                 |                |                 |                |                 |                |                       |                      |                               |                              |                        |                       |                             |               |              |                          |                           |                           |                           |                |               |
| Peroxisome                                         | -0,8          | -0,4         |             |            | 0,4          | 0,4         | 0,4             | 0,4            |                 |                |                 |                |                 |                |                       |                      |                               |                              |                        |                       |                             | 0,5           |              | 0,3                      |                           |                           |                           |                |               |
| Phenylalanine.tyrosine.and.tryptophan.biosynthesis | -0,7          | -0,4         | -0,3        |            |              |             |                 |                |                 |                |                 |                |                 |                |                       |                      |                               |                              |                        |                       |                             |               |              |                          |                           |                           |                           |                |               |
| Phosphotransferase.system.PTS.                     | 0,6           |              |             |            |              |             |                 |                |                 |                |                 |                |                 |                |                       |                      |                               |                              |                        |                       |                             |               |              |                          |                           |                           |                           |                |               |
| Primary.bile.acid.biosynthesis                     |               | -0,5         | -0,5        | -0,4       |              |             |                 |                |                 | 0,5            | 0,5             |                |                 |                |                       |                      |                               |                              |                        | 0,6                   |                             |               |              |                          |                           |                           |                           |                |               |
| Propanoate.metabolism                              | 0,6           |              |             |            | -0,3         |             |                 |                |                 |                |                 |                |                 |                |                       |                      |                               |                              |                        |                       |                             |               |              |                          |                           |                           |                           |                |               |
| Secondary.bile.acid.biosynthesis                   |               | -0,5         | -0,5        |            |              |             |                 |                |                 |                |                 |                |                 |                | 0,7                   |                      |                               |                              |                        |                       |                             |               |              |                          |                           |                           |                           |                |               |
| Sphingolipid.metabolism                            | -0,7          | -0,4         |             |            | 0,4          | 0,4         | 0,4             |                |                 |                |                 |                |                 |                |                       |                      |                               |                              |                        |                       |                             | 0,4           | 0,4          |                          |                           |                           |                           |                |               |
| Starch.and.sucrose.metabolism (also 6 mo)          | -0,4          | -0,5         | -0,4        | -0,4       |              |             | -0,4            | -0,4           |                 |                |                 |                |                 |                |                       |                      |                               |                              |                        |                       |                             | -0,5          | -0,4         |                          |                           |                           |                           |                |               |
| Sulfur.relay.system                                | 0,6           |              |             | 0,4        | 0,4          | -0,4        |                 |                |                 |                |                 |                |                 |                |                       |                      |                               |                              |                        |                       |                             |               |              |                          |                           |                           |                           |                |               |
| Tyrosine.metabolism                                | 0,7           | 0,3          | 0,4         |            |              |             |                 |                |                 |                |                 |                |                 |                |                       |                      |                               |                              |                        |                       |                             |               |              |                          |                           |                           |                           |                |               |
| Valine.leucine.and.isoleucine.biosynthesis         | -0,7          |              |             |            |              | 0,3         | 0,4             | 0,3            |                 |                |                 |                |                 |                |                       |                      |                               |                              |                        |                       |                             | 0,3           |              |                          |                           |                           | 0,3                       |                |               |

**Table S2. Regression coefficients for associations given in Figure 3C-F**

| 1 month old offspring                 | L-CT caecum                      | L-CT colon                      | Steatosi Macro caecum | Portal inflamm. caecum | Liver lob. inflamm./score colon | Gut-GU60 colon  | VF-GE10 colon  | VF-GE60 colon   | VF-GU10 colon  | VF-GU60 caecum | VF-GU60 colon |
|---------------------------------------|----------------------------------|---------------------------------|-----------------------|------------------------|---------------------------------|-----------------|----------------|-----------------|----------------|----------------|---------------|
| f_Peptostreptococcaceae               |                                  |                                 |                       |                        |                                 |                 |                |                 | 0,5            |                | 0,5           |
| f_Porphyromonadaceae                  |                                  |                                 |                       |                        |                                 |                 |                | 0,5             | 0,5            |                | 0,6           |
| f_RF39_uncl                           |                                  |                                 |                       |                        | 0,7                             |                 |                |                 |                |                | 0,6           |
| g_Anaerotruncus                       |                                  |                                 |                       |                        | -0,7                            |                 |                |                 | -0,5           | -0,7           |               |
| g_Clostridium                         |                                  |                                 |                       |                        | 0,5                             |                 |                |                 |                |                |               |
| g_Parabacteroides                     |                                  |                                 |                       |                        |                                 |                 |                | 0,5             | 0,5            |                | 0,6           |
| g_Peptostreptococcaceae               |                                  |                                 |                       |                        |                                 |                 |                |                 |                |                | 0,5           |
| g_RF39_uncl                           |                                  |                                 |                       |                        | 0,7                             |                 |                |                 |                | 0,6            | 0,6           |
| g_Rikenellaceae_uncl                  |                                  |                                 |                       |                        |                                 | 0,6             | 0,6            | 0,6             |                | 0,6            |               |
|                                       |                                  |                                 |                       |                        |                                 |                 |                |                 |                |                |               |
| Butanoate.metabolism                  |                                  |                                 |                       | -0,6                   |                                 |                 |                |                 |                |                |               |
| Lysine.degradation                    | 0,5                              | 0,5                             |                       |                        |                                 |                 |                |                 |                |                |               |
| Phenylalanine.metabolism              |                                  |                                 | -0,7                  | -0,7                   |                                 |                 |                |                 |                |                | 0,5           |
| PPAR.signaling.pathway                |                                  |                                 |                       | -0,7                   |                                 |                 |                |                 |                |                |               |
| Pyruvate.metabolism                   |                                  |                                 |                       | -0,7                   |                                 |                 |                |                 |                |                |               |
| Tryptophan.metabolism                 | 0,5                              |                                 |                       |                        |                                 |                 |                |                 |                |                |               |
|                                       |                                  |                                 |                       |                        |                                 |                 |                |                 |                |                |               |
|                                       |                                  |                                 |                       |                        |                                 |                 |                |                 |                |                |               |
| 6 months old offspring                | Liver lob. inflamm./score caecum | Liver lob. inflamm./score colon | L-GU60 caecum         | L-GE60 colon           | L-GU60 colon                    | Gut-GE60 caecum | Gut-GE60 colon | Gut-GU60 caecum | Gut-GU60 colon |                |               |
| f_Clostridiales_uncl                  | 0,8                              |                                 |                       |                        | -0,5                            |                 |                | -0,6            |                |                |               |
| f_Coriobacteriaceae                   |                                  |                                 | 0,6                   |                        | 0,5                             |                 |                |                 |                |                |               |
| f_Peptococcaceae                      |                                  |                                 |                       |                        | -0,5                            |                 |                | -0,5            |                |                |               |
| f_Turicibacteriaceae                  |                                  |                                 |                       |                        |                                 | -0,5            | -0,6           | -0,6            |                |                |               |
| g_Allobaculum                         |                                  |                                 |                       |                        | 0,6                             |                 |                |                 |                |                |               |
| g_Clostridiales_uncl                  | 0,8                              |                                 |                       |                        | -0,5                            |                 | -0,6           |                 |                |                |               |
| g_Desulfovibrio                       |                                  |                                 | 0,5                   |                        |                                 |                 |                |                 |                |                |               |
| g_rc44                                |                                  |                                 |                       |                        | -0,5                            |                 | -0,5           |                 |                |                |               |
| g_Ruminococcaceae_uncl                |                                  |                                 |                       |                        | -0,6                            |                 |                |                 |                |                |               |
| g_Turicibacter                        |                                  |                                 |                       |                        |                                 | -0,5            | 0,6            | -0,6            |                |                |               |
|                                       |                                  |                                 |                       |                        |                                 |                 |                |                 |                |                |               |
| Arachidonic.acid.metabolism           |                                  |                                 |                       |                        |                                 | 0,5             | 0,5            |                 | 0,6            |                |               |
| Butanoate.metabolism                  |                                  | -0,8                            |                       |                        |                                 |                 |                |                 |                |                |               |
| Cyanoamino.acid.metabolism            | 0,9                              |                                 |                       |                        | -0,6                            |                 |                |                 |                |                |               |
| Cysteine.and.methionine.metabolism    |                                  |                                 |                       | 0,5                    |                                 |                 |                | 0,6             |                |                |               |
| Glycan.biosynthesis.and.metabolism    |                                  |                                 |                       |                        | 0,6                             |                 |                |                 |                |                |               |
| Insulin.signaling.pathway             | 0,5                              | 0,8                             |                       |                        |                                 |                 |                |                 |                |                |               |
| Methane.metabolism                    | 0,8                              |                                 |                       |                        | -0,6                            |                 |                |                 |                |                |               |
| Nitrogen.metabolism                   | -0,8                             |                                 |                       | 0,6                    |                                 |                 |                |                 |                |                |               |
| Phenylalanine.metabolism              |                                  |                                 |                       |                        |                                 |                 |                |                 | 0,6            |                |               |
| Phosphatidylinositol.signaling.system | -0,8                             | 0,5                             |                       |                        |                                 |                 |                |                 |                |                |               |
| Sulfur.metabolism                     |                                  |                                 |                       |                        |                                 |                 | 0,6            | 0,6             | 0,6            |                |               |
| Taurine.and.hypotaurine.metabolism    |                                  | 0,7                             |                       |                        |                                 |                 |                |                 |                |                |               |

**Figure S1**

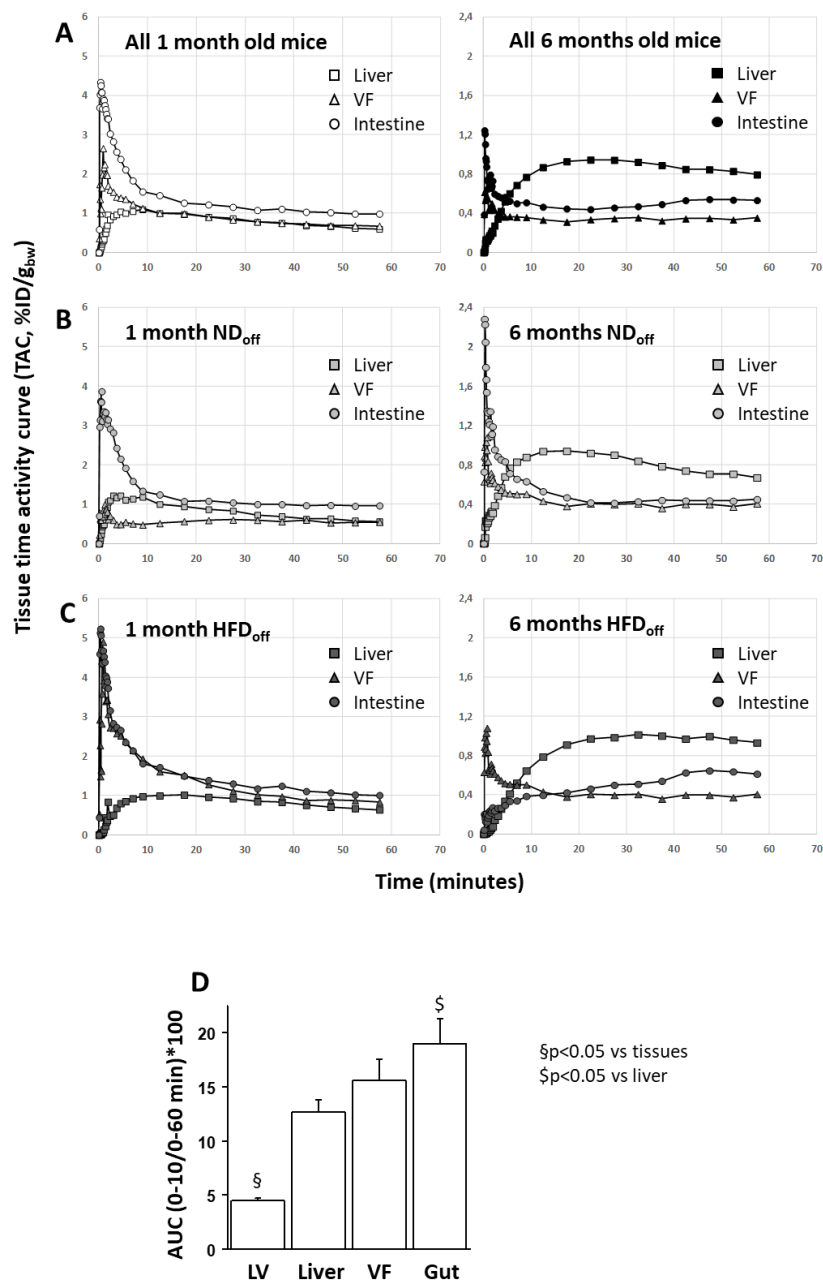

**Figure S1. Radiotracer distribution between tissues.** Top panels depict the time-course and relative proportions of  $^{18}\text{F}$ FDG reaching the visceral organs, in weaning vs adult mice (A), and in maternal diet\*age groups (B-C). Panel D shows the relative amount of FDG reaching arterial blood (left ventricular cardiac cavity, LV) and target organs in the first 10 min from i.p. injection, defining the pre-systemic phase, in which §p<0.05 LV vs all tissues, and \$p<0.05 gut vs liver.

**Figure S2**

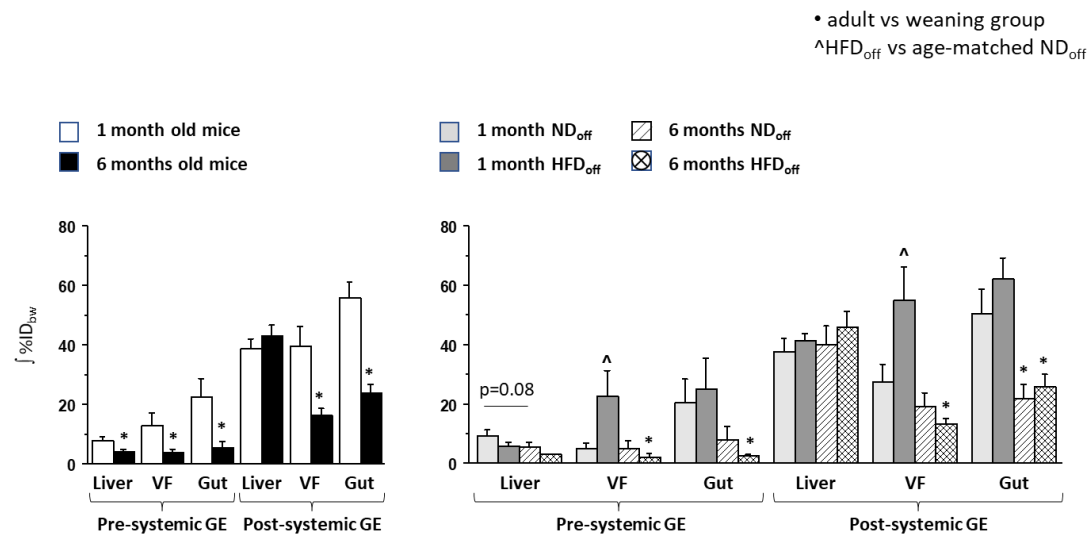

**Figure S2: Glucose fractional extraction.** GE in liver, VF and gut in the offspring, according to age (top panels), or to maternal diet\*age (bottom panels). \*p<0.05 adult vs weaning group, ^p<0.05 age-matched HFD<sub>off</sub> vs ND<sub>off</sub>; relevant borderline differences are also shown (text).

**Figure S3**

1 month CAECUM

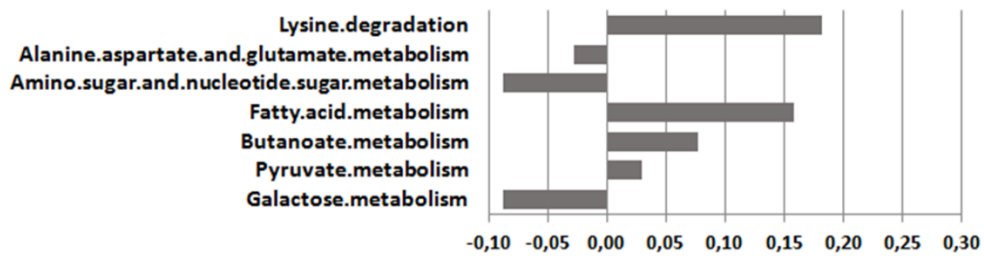

1 month COLON

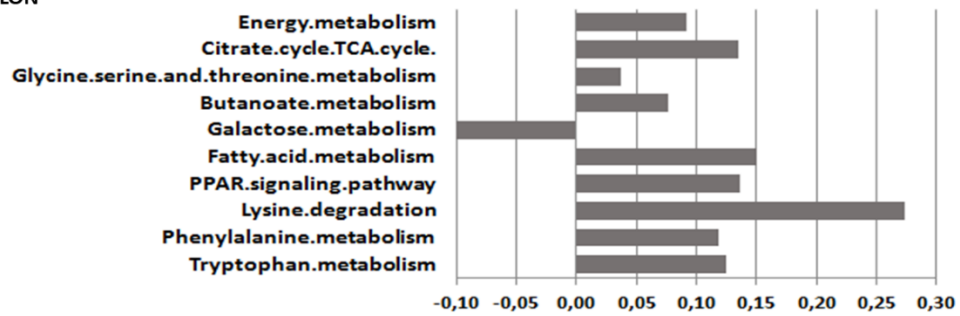

6 months CAECUM

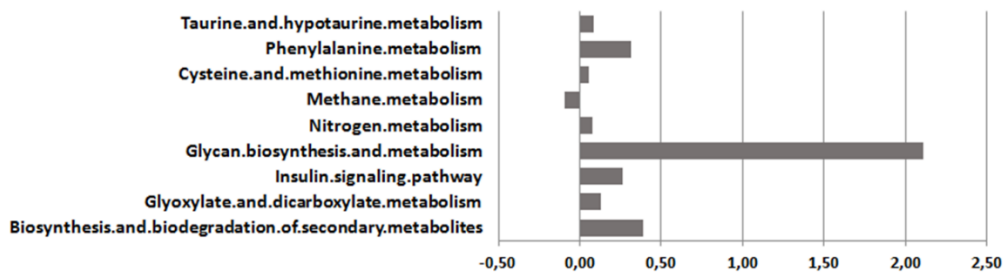

6 months COLON

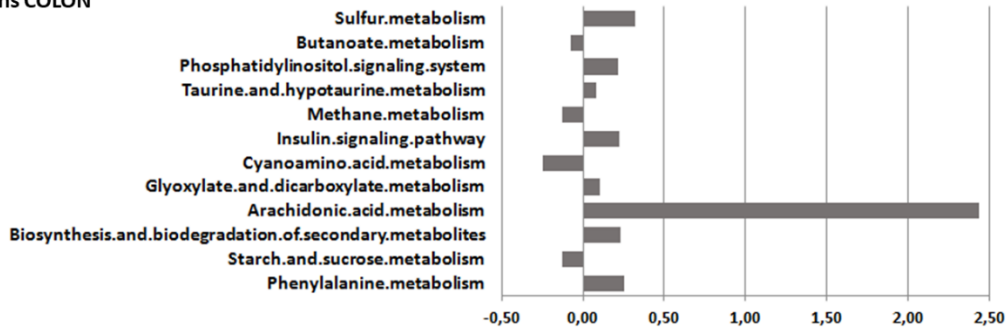

**Figure S3: Colon and caecum KEGG analyses according to maternal diet\*age.** Analyses show significantly different metabolic pathways, here expressed as HFD<sub>off</sub>/ND<sub>off</sub> ratios in weaning mice (top panels) and adult mice (bottom panels); positive values identify dominant pathways in HFD<sub>off</sub>, whereas negative values indicate dominance in ND<sub>off</sub> and deficiency in HFD<sub>off</sub>.
